# Supplementary material
Source: Elsevier journal article supplement (https://lshtm-eprints-repo-prod.lshtm-eprints.cdl.cosector.com/1104/1/mmc3.pdf)
Supplement: mmc3 [file mmc3.pdf]

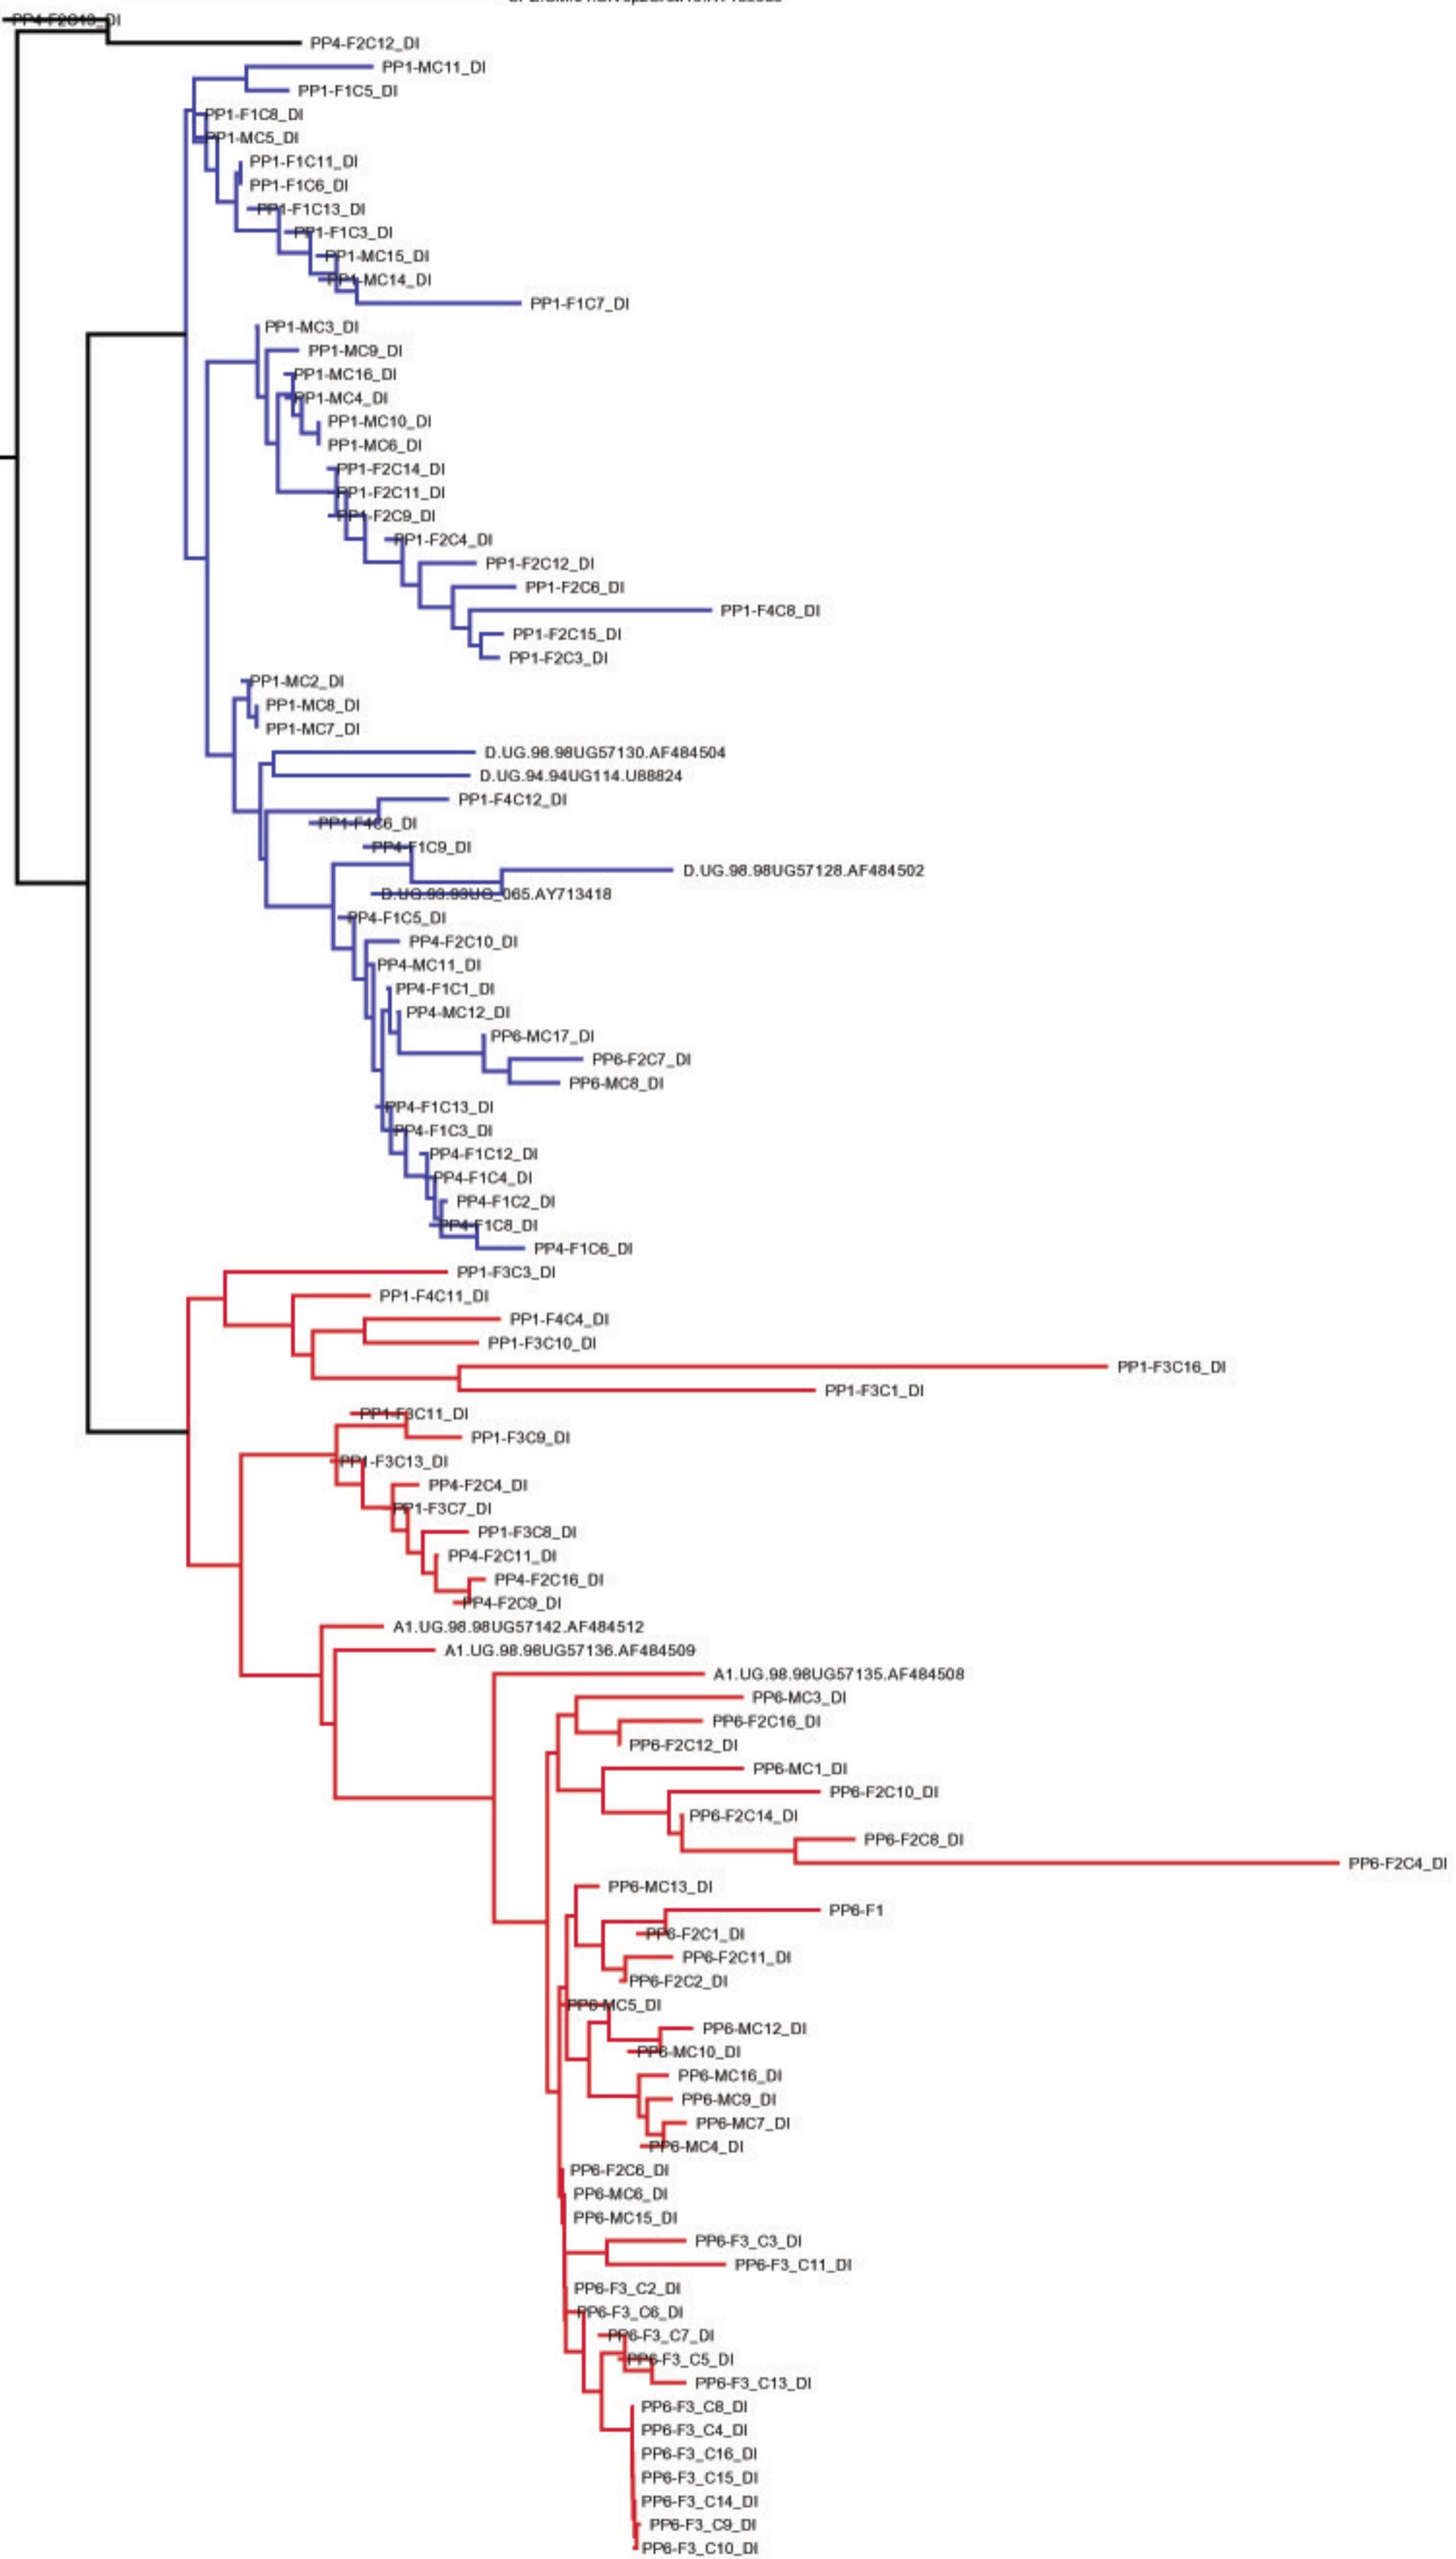

D

A

Sup. Fig. 1C  
pol-IN clones and direct sequences

0.03
